# Supplementary material
Source: publisher figshare collection journal article supplement (https://sage.figshare.com/ndownloader/files/17905250)
Supplement: Supplementary file 1 [file 17905250]

| Project Milestones - 6 months                                                                                                         |  | Team #1 | Team #2 | Team #3 | Team #4 | Team #5     | Team #6     | Team #7 | Team #8 | Team #9 | Team #10 | Team #11    | Team #12 | Team #13 | Team #14 | Team #15 | Team #16 | Team #17 | Team #18 | Team #19 | Team #20 | Team #21 | Team #22    | Team #23    | Team #24 | Team #25 | Team #26 | Team #27 | Team #28 | Team #29 | % Milestone reached by NIV teams |
|---------------------------------------------------------------------------------------------------------------------------------------|--|---------|---------|---------|---------|-------------|-------------|---------|---------|---------|----------|-------------|----------|----------|----------|----------|----------|----------|----------|----------|----------|----------|-------------|-------------|----------|----------|----------|----------|----------|----------|----------------------------------|
|                                                                                                                                       |  | Current | Current | Current | Current | No Response | No Response | Current | Current | Current | Current  | No Response | Current  | No Response | No Response | Current  | Current  | Current  | Current  | Current  | Current  |                                  |
| Pre-work/Background                                                                                                                   |  |         |         |         |         |             |             |         |         |         |          |             |          |          |          |          |          |          |          |          |          |          |             |             |          |          |          |          |          |          |                                  |
| Project opportunity statement (working draft)                                                                                         |  | 🟢       | 🟢       | 🟡       | 🟢       | 🔴           | 🔴           | 🟢       | 🟡       | 🟢       | 🟡        | 🟡           | 🟡        | 🟡        | 🔴        | 🟡        | 🟢        | 🟢        | 🟢        | 🟢        | 🟡        | 🟡        | 🔴           | 🔴           | 🟡        | 🟢        | 🟢        | 🟢        | 🔴        | 🟡        |                                  |
| Team organized (e.g. roles and responsibilities), incl stakeholder (e.g. community voice), charter, objectives, etc.                  |  | 🟢       | 🟡       |         | 🟡       | 🟢           | 🔴           | 🔴       | 🟡       | 🟢       |          | 🟢           | 🟢        | 🔴        | 🟡        | 🟡        | 🟢        | 🟢        | 🟢        | 🟡        | 🟡        | 🔴        | 🟡           | 🔴           | 🟡        | 🟢        | 🟢        | 🟢        | 🟢        | 🟡        |                                  |
| Review Squire Guidelines and consider scholarly output for project                                                                    |  | 🟡       | 🟡       |         | 🔴       | 🟢           | 🔴           | 🔴       |         | 🟡       |          | 🔴           | 🔴        | 🔴        | 🔴        | 🔴        | 🟢        | 🟢        |          | 🔴        | 🔴        | 🔴        | 🔴           | 🔴           | 🔴        | 🟡        | 🟡        | 🟡        | 🟡        | 🟡        |                                  |
| Learning: pre-reading (e.g. AIAMC resources, CHNA, other)                                                                             |  | 🟡       | 🟡       |         | 🔴       | 🟢           | 🔴           | 🔴       |         | 🟡       |          | 🔴           | 🔴        | 🔴        | 🔴        | 🔴        | 🔴        | 🟢        | 🟢        | 🟢        | 🔴        | 🔴        | 🔴           | 🔴           | 🟡        | 🟡        | 🟡        | 🟡        | 🟡        | 🟡        |                                  |
| Learning: stakeholder interviews                                                                                                      |  | 🟡       | 🟡       |         | 🔴       | 🟡           | 🔴           | 🔴       |         | 🟡       |          | 🟡           | 🟡        | 🟡        | 🔴        | 🟡        | 🟢        | 🟢        | 🟢        | 🟢        | 🟢        | 🔴        | 🔴           | 🔴           | 🟢        | 🟢        | 🟢        | 🟡        | 🟡        | 🟡        |                                  |
| Measurement                                                                                                                           |  |         |         |         |         |             |             |         |         |         |          |             |          |          |          |          |          |          |          |          |          |          |             |             |          |          |          |          |          |          |                                  |
| Synthesis of background knowledge and project description                                                                             |  | 🟡       | 🟢       |         | 🟡       | 🔴           | 🔴           | 🟡       |         | 🟢       |          | 🟡           | 🟡        | 🟡        | 🟡        | 🟢        | 🟢        | 🟢        | 🟢        | 🟡        | 🔴        | 🟢        | 🔴           | 🔴           | 🟡        | 🟢        | 🟢        | 🟢        | 🟢        | 🟡        |                                  |
| Identify data, its sources and collection plan, analyze baseline data                                                                 |  | 🟡       | 🟡       |         | 🔴       | 🟢           | 🔴           |         | 🔴       |         | 🟢        |             | 🟢        |          |          |          |          | 🟡        | 🟡        | 🟡        | 🟡        | 🟡        | 🔴           | 🔴           | 🔴        | 🟡        | 🟡        | 🟡        | 🟡        | 🟡        |                                  |
| Define improvement goal and measures of success                                                                                       |  | 🟡       | 🟡       |         | 🟡       | 🟡           |             |         |         | 🟢       |          | 🔴           | 🟢        | 🔴        | 🔴        | 🟢        | 🟢        |          | 🔴        | 🟡        | 🟡        | 🟡        | 🔴           | 🔴           | 🔴        | 🟡        | 🟡        | 🟡        | 🟡        | 🟡        |                                  |
| Methods                                                                                                                               |  |         |         |         |         |             |             |         |         |         |          |             |          |          |          |          |          |          |          |          |          |          |             |             |          |          |          |          |          |          |                                  |
| List of potential solutions (short-term and long term fixes); prioritize solutions; action planning                                   |  | 🔴       |         | 🔴       | 🟡       |             | 🔴           |         | 🟡       |         | 🟡        | 🔴           | 🟢        | 🔴        |          | 🟡        | 🟢        | 🟢        |          | 🟡        | 🔴        |          | 🔴           | 🔴           | 🟡        | 🟡        | 🟡        | 🟡        | 🟡        | 🟡        |                                  |
| Evaluate and choose implementation methodology (e.g. Kern's for curriculum/program development, PDSA for process improvement project) |  | 🟡       | 🟡       | 🔴       | 🟡       | 🔴           | 🔴           |         | 🟡       |         | 🟡        | 🔴           | 🔴        | 🟡        | 🟡        | 🟡        | 🟢        |          | 🟡        | 🟢        | 🔴        | 🔴        | 🔴           | 🔴           | 🔴        | 🟡        | 🟡        |          | 🟢        | 🟡        | 🟡                                |
| IRB submission                                                                                                                        |  | 🔴       | 🔴       |         | 🟡       |             | 🔴           |         | 🔴       |         | 🔴        | 🔴           | 🔴        | 🔴        | 🔴        |          | 🔴        | 🟢        |          | 🔴        | 🟡        | 🟢        | 🔴           | 🔴           | 🔴        | 🔴        | 🔴        |          | 🟢        | 🟡        | 🟡                                |
| Develop and execute on stakeholder communication plan                                                                                 |  | 🔴       | 🟡       |         | 🔴       | 🔴           | 🔴           |         | 🟡       |         | 🟡        | 🔴           | 🔴        | 🔴        | 🔴        | 🟡        | 🟢        | 🟢        |          | 🟡        | 🔴        | 🔴        | 🔴           | 🔴           | 🔴        | 🔴        | 🔴        | 🔴        | 🔴        | 🟡        | 🟡                                |
| Assess and plan for potential resource needs                                                                                          |  | 🔴       | 🟡       |         | 🟡       | 🔴           | 🔴           |         | 🟡       |         | 🟡        | 🔴           | 🔴        | 🔴        | 🔴        | 🟡        | 🟢        | 🟢        |          | 🟡        | 🔴        | 🔴        | 🔴           | 🔴           | 🔴        | 🔴        | 🔴        | 🔴        | 🔴        | 🟡        | 🟡                                |
| Reassess data needed, collection method, and plan during implementation                                                               |  | 🔴       | 🟡       |         | 🔴       | 🟡           | 🔴           |         | 🟡       |         | 🟡        | 🔴           | 🔴        | 🔴        | 🔴        | 🟡        | 🔴        |          | 🟡        | 🟡        | 🔴        | 🔴        | 🔴           | 🔴           | 🔴        | 🔴        | 🔴        |          | 🟡        | 🟡        | 🟡                                |
| Action plan implementation timeline -implement                                                                                        |  | 🔴       | 🟡       |         | 🔴       | 🟡           | 🔴           |         | 🟡       |         | 🟡        | 🟢           | 🟢        | 🔴        | 🔴        | 🟡        | 🟡        | 🟡        | 🟡        | 🟡        | 🔴        | 🔴        | 🔴           | 🔴           | 🔴        | 🔴        | 🔴        | 🔴        | 🟡        | 🟡        | 🟡                                |
| Implement - Measure - Adjust - Sustain                                                                                                |  |         | 🟡       |         |         |             |             |         |         | 🟡       |          |             |          |          |          | 🟡        |          |          |          |          |          |          |             |             |          |          |          |          |          |          |                                  |
| Interpret results (process measures, structural measures); data presentation plan                                                     |  | 🔴       | 🟡       |         | 🔴       | 🔴           | 🔴           |         | 🔴       |         | 🔴        | 🔴           | 🔴        | 🔴        | 🔴        |          | 🔴        | 🔴        | 🔴        | 🔴        | 🔴        | 🔴        | 🔴           | 🔴           | 🔴        | 🔴        | 🔴        | 🔴        | 🔴        | 🔴        | 🔴                                |
| Revise implementation based upon ongoing data analysis                                                                                |  | 🔴       | 🟡       |         | 🔴       | 🔴           | 🔴           |         | 🔴       |         | 🔴        | 🔴           | 🔴        | 🔴        | 🔴        | 🟡        |          | 🔴        | 🔴        | 🔴        | 🔴        | 🔴        | 🔴           | 🔴           | 🔴        | 🔴        | 🔴        | 🔴        | 🔴        | 🔴        | 🔴                                |
| Execute on communication plan                                                                                                         |  | 🔴       | 🟡       |         | 🔴       | 🔴           | 🔴           |         | 🟡       |         | 🔴        | 🔴           | 🔴        | 🔴        | 🔴        | 🟡        |          | 🔴        | 🔴        | 🔴        | 🔴        | 🔴        | 🔴           | 🔴           | 🔴        | 🔴        | 🔴        | 🔴        | 🔴        | 🔴        | 🔴                                |
| Prepare poster for April's AIAMC annual meeting                                                                                       |  | 🔴       | 🟡       |         | 🔴       | 🔴           | 🔴           |         | 🔴       |         | 🔴        | 🔴           | 🔴        | 🔴        | 🔴        | 🟡        |          | 🔴        | 🔴        | 🔴        | 🔴        | 🔴        | 🔴           | 🔴           | 🔴        | 🔴        | 🔴        | 🔴        | 🔴        | 🔴        | 🔴                                |
| Interpret results (process measures, structural measures); data presentation plan                                                     |  | 🔴       | 🟡       |         | 🔴       | 🔴           | 🔴           |         | 🟡       |         | 🔴        | 🔴           | 🔴        | 🔴        | 🔴        | 🟡        |          | 🔴        | 🔴        | 🔴        | 🔴        | 🔴        | 🔴           | 🔴           | 🔴        | 🔴        | 🔴        | 🔴        | 🔴        | 🔴        | 🔴                                |
| Revise implementation based upon ongoing data analysis                                                                                |  | 🔴       | 🟡       |         | 🔴       | 🔴           | 🔴           |         | 🟡       |         | 🔴        | 🔴           | 🔴        | 🔴        | 🔴        | 🟡        |          | 🔴        | 🔴        | 🔴        | 🔴        | 🔴        | 🔴           | 🔴           | 🔴        | 🔴        | 🔴        | 🔴        | 🔴        | 🔴        | 🔴                                |
| Project sustainability path forward                                                                                                   |  | 🔴       | 🟡       |         | 🔴       | 🔴           | 🔴           |         | 🟡       |         | 🔴        | 🔴           | 🔴        | 🔴        | 🔴        | 🟡        |          | 🔴        | 🔴        | 🔴        | 🔴        | 🔴        | 🔴           | 🔴           | 🔴        | 🔴        | 🔴        | 🔴        | 🔴        | 🔴        | 🔴                                |
| Post -program survey                                                                                                                  |  |         |         |         |         |             |             |         |         |         |          |             |          |          |          |          |          |          |          |          |          |          |             |             |          |          |          |          |          |          |                                  |
| % Milestone Reached by Participant                                                                                                    |  |         |         |         |         |             |             |         |         |         |          |             |          |          |          |          |          |          |          |          |          |          |             |             |          |          |          |          |          |          |                                  |
|                                                                                                                                       |  |         |         |         |         |             |             |         |         |         |          |             |          |          |          |          |          |          |          |          |          |          |             |             |          |          |          |          |          |          |                                  |
|                                                                                                                                       |  |         |         |         |         |             |             |         |         |         |          |             |          |          |          |          |          |          |          |          |          |          |             |             |          |          |          |          |          |          |                                  |
|                                                                                                                                       |  |         |         |         |         |             |             |         |         |         |          |             |          |          |          |          |          |          |          |          |          |          |             |             |          |          |          |          |          |          |                                  |
|                                                                                                                                       |  |         |         |         |         |             |             |         |         |         |          |             |          |          |          |          |          |          |          |          |          |          |             |             |          |          |          |          |          |          |                                  |
|                                                                                                                                       |  |         |         |         |         |             |             |         |         |         |          |             |          |          |          |          |          |          |          |          |          |          |             |             |          |          |          |          |          |          |                                  |
|                                                                                                                                       |  |         |         |         |         |             |             |         |         |         |          |             |          |          |          |          |          |          |          |          |          |          |             |             |          |          |          |          |          |          |                                  |
|                                                                                                                                       |  |         |         |         |         |             |             |         |         |         |          |             |          |          |          |          |          |          |          |          |          |          |             |             |          |          |          |          |          |          |                                  |
|                                                                                                                                       |  |         |         |         |         |             |             |         |         |         |          |             |          |          |          |          |          |          |          |          |          |          |             |             |          |          |          |          |          |          |                                  |
|                                                                                                                                       |  |         |         |         |         |             |             |         |         |         |          |             |          |          |          |          |          |          |          |          |          |          |             |             |          |          |          |          |          |          |                                  |
|                                                                                                                                       |  |         |         |         |         |             |             |         |         |         |          |             |          |          |          |          |          |          |          |          |          |          |             |             |          |          |          |          |          |          |                                  |
|                                                                                                                                       |  |         |         |         |         |             |             |         |         |         |          |             |          |          |          |          |          |          |          |          |          |          |             |             |          |          |          |          |          |          |                                  |
|                                                                                                                                       |  |         |         |         |         |             |             |         |         |         |          |             |          |          |          |          |          |          |          |          |          |          |             |             |          |          |          |          |          |          |                                  |
|                                                                                                                                       |  |         |         |         |         |             |             |         |         |         |          |             |          |          |          |          |          |          |          |          |          |          |             |             |          |          |          |          |          |          |                                  |
|                                                                                                                                       |  |         |         |         |         |             |             |         |         |         |          |             |          |          |          |          |          |          |          |          |          |          |             |             |          |          |          |          |          |          |                                  |
|                                                                                                                                       |  |         |         |         |         |             |             |         |         |         |          |             |          |          |          |          |          |          |          |          |          |          |             |             |          |          |          |          |          |          |                                  |
|                                                                                                                                       |  |         |         |         |         |             |             |         |         |         |          |             |          |          |          |          |          |          |          |          |          |          |             |             |          |          |          |          |          |          |                                  |
|                                                                                                                                       |  |         |         |         |         |             |             |         |         |         |          |             |          |          |          |          |          |          |          |          |          |          |             |             |          |          |          |          |          |          |                                  |
|                                                                                                                                       |  |         |         |         |         |             |             |         |         |         |          |             |          |          |          |          |          |          |          |          |          |          |             |             |          |          |          |          |          |          |                                  |
|                                                                                                                                       |  |         |         |         |         |             |             |         |         |         |          |             |          |          |          |          |          |          |          |          |          |          |             |             |          |          |          |          |          |          |                                  |
|                                                                                                                                       |  |         |         |         |         |             |             |         |         |         |          |             |          |          |          |          |          |          |          |          |          |          |             |             |          |          |          |          |          |          |                                  |
|                                                                                                                                       |  |         |         |         |         |             |             |         |         |         |          |             |          |          |          |          |          |          |          |          |          |          |             |             |          |          |          |          |          |          |                                  |
|                                                                                                                                       |  |         |         |         |         |             |             |         |         |         |          |             |          |          |          |          |          |          |          |          |          |          |             |             |          |          |          |          |          |          |                                  |
|                                                                                                                                       |  |         |         |         |         |             |             |         |         |         |          |             |          |          |          |          |          |          |          |          |          |          |             |             |          |          |          |          |          |          |                                  |
|                                                                                                                                       |  |         |         |         |         |             |             |         |         |         |          |             |          |          |          |          |          |          |          |          |          |          |             |             |          |          |          |          |          |          |                                  |
|                                                                                                                                       |  |         |         |         |         |             |             |         |         |         |          |             |          |          |          |          |          |          |          |          |          |          |             |             |          |          |          |          |          |          |                                  |
|                                                                                                                                       |  |         |         |         |         |             |             |         |         |         |          |             |          |          |          |          |          |          |          |          |          |          |             |             |          |          |          |          |          |          |                                  |
|                                                                                                                                       |  |         |         |         |         |             |             |         |         |         |          |             |          |          |          |          |          |          |          |          |          |          |             |             |          |          |          |          |          |          |                                  |
|                                                                                                                                       |  |         |         |         |         |             |             |         |         |         |          |             |          |          |          |          |          |          |          |          |          |          |             |             |          |          |          |          |          |          |                                  |
|                                                                                                                                       |  |         |         |         |         |             |             |         |         |         |          |             |          |          |          |          |          |          |          |          |          |          |             |             |          |          |          |          |          |          |                                  |
|                                                                                                                                       |  |         |         |         |         |             |             |         |         |         |          |             |          |          |          |          |          |          |          |          |          |          |             |             |          |          |          |          |          |          |                                  |
|                                                                                                                                       |  |         |         |         |         |             |             |         |         |         |          |             |          |          |          |          |          |          |          |          |          |          |             |             |          |          |          |          |          |          |                                  |
|                                                                                                                                       |  |         |         |         |         |             |             |         |         |         |          |             |          |          |          |          |          |          |          |          |          |          |             |             |          |          |          |          |          |          |                                  |
|                                                                                                                                       |  |         |         |         |         |             |             |         |         |         |          |             |          |          |          |          |          |          |          |          |          |          |             |             |          |          |          |          |          |          |                                  |
|                                                                                                                                       |  |         |         |         |         |             |             |         |         |         |          |             |          |          |          |          |          |          |          |          |          |          |             |             |          |          |          |          |          |          |                                  |
|                                                                                                                                       |  |         |         |         |         |             |             |         |         |         |          |             |          |          |          |          |          |          |          |          |          |          |             |             |          |          |          |          |          |          |                                  |
|                                                                                                                                       |  |         |         |         |         |             |             |         |         |         |          |             |          |          |          |          |          |          |          |          |          |          |             |             |          |          |          |          |          |          |                                  |
|                                                                                                                                       |  |         |         |         |         |             |             |         |         |         |          |             |          |          |          |          |          |          |          |          |          |          |             |             |          |          |          |          |          |          |                                  |
|                                                                                                                                       |  |         |         |         |         |             |             |         |         |         |          |             |          |          |          |          |          |          |          |          |          |          |             |             |          |          |          |          |          |          |                                  |
|                                                                                                                                       |  |         |         |         |         |             |             |         |         |         |          |             |          |          |          |          |          |          |          |          |          |          |             |             |          |          |          |          |          |          |                                  |
|                                                                                                                                       |  |         |         |         |         |             |             |         |         |         |          |             |          |          |          |          |          |          |          |          |          |          |             |             |          |          |          |          |          |          |                                  |
|                                                                                                                                       |  |         |         |         |         |             |             |         |         |         |          |             |          |          |          |          |          |          |          |          |          |          |             |             |          |          |          |          |          |          |                                  |
|                                                                                                                                       |  |         |         |         |         |             |             |         |         |         |          |             |          |          |          |          |          |          |          |          |          |          |             |             |          |          |          |          |          |          |                                  |
|                                                                                                                                       |  |         |         |         |         |             |             |         |         |         |          |             |          |          |          |          |          |          | </       |          |          |          |             |             |          |          |          |          |          |          |                                  |
